# Supplementary material for: Metformin Ameliorates Gestational Diabetes Mellitus-Induced Endothelial Dysfunction via Downregulation of p65 and Upregulation of Nrf2
Source: PubMed Central journal article supplement (PMC7581851; doi:10.3389/fphar.2020.575390), 2020-10-09
Supplement: Presentation_1.pdf [file Presentation_1.pdf]

## Material and methods

### CCK-8 assay

Cell survival rates were estimated by the CCK-8 assay (MedChemExpress, HY-K0301). Approximately  $5 \times 10^4$  cells were seeded in 96-well plates with 100  $\mu$ L medium each well. After 24 h cultivation, different doses of glucose and/or MET were added respectively and incubated for 72 h. Each well was incubated with 10  $\mu$ L CCK-8 solution for 2 h away from light before measuring the absorbance at 450 nm by Microplate Reader (Molecular Devices, Flexstation® 3).

### Figure legends

**Fig. S1 Effects of different concentrations of sugar and metformin on cell proliferation and migration.** (A, B, C, D) A scratch wound assay was performed in the presence of 5.5, 15, 35 or 55  $\mu$ M glucose (A) and 35 mM glucose with/without 25, 50, 100 or 200  $\mu$ M MET (C) treatment for 72 h. Cell monolayers were imaged at 0, 24, and 48 after wounding. White vertical lines indicate the wound area borders. Space bar=100  $\mu$ m. The images shown here were captured at 0 and 24 h. The cell migration distance was measured and shown in (B) and (D) respectively. (E, F) CCK8 assay was used to detect the chemo-sensitivity of 5.5, 15, 35 or 55  $\mu$ M glucose (E) and 35 mM glucose with/without 25, 50, 100 or 200  $\mu$ M MET (F) treatment. The survival rate = (mean absorbance of experimental group/mean absorbance of control group)  $\times$  100%. All the values displayed are mean  $\pm$  SEM of 5 independent experiments. \*P < 0.05, \*\*\*P < 0.001 vs. 5.5 mM D-Glucose group; #P < 0.05, ###P < 0.01, ####P < 0.001 vs. 35 mM D-Glucose group.

**Fig. S2 The effect of MET on oxidative stress under high glucose treatment in HUVECs.** (A, B) Western blot analysis of the HO-1 level in HUVECs treated with 5.5 or 35 mM D-Glucose with or without MET (100  $\mu$ M) or Bay11-7082 (0.5  $\mu$ M) for 72 h. The HO-1 level was quantified and shown in (B). (C, D) ELISA assay was performed to evaluate the level of protein carbonyl (C) and 8-isoprostane (D) in HUVECs treated with 35 mM D-Glucose with or without MET (100  $\mu$ M). All the values displayed are mean  $\pm$  SEM of 5 independent experiments. \*\*\*P < 0.001 vs. 5.5 mM D-Glucose group;

#P < 0.05, ##P < 0.01, ###P < 0.001 vs. 35 mM D-Glucose group.
